# Supplementary material for: Photophysical and magnetic properties of magnetic silica gel-supported silicon phthalocyanine complexes
Source: Royal Society of Chemistry journal article supplement (doi:10.1039/b811128f), 2008-12-18
Supplement: b811128f.pdf [file b811128f.pdf]

# Photophysical and Magnetic Properties of Magnetic Silica Gel-Supported Silicon Phthalocyanine Complexes

Kazutaka Ozawa and Kazuyuki Ishii

## Supplementary Information

### SQUID data

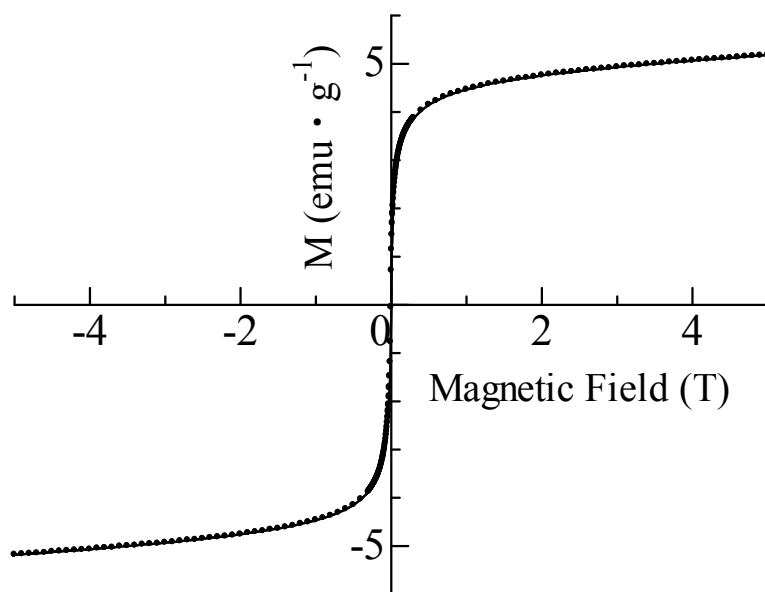

**Fig. S1.** Magnetic hysteresis loop of SiPc-MNP-SiO<sub>2</sub> at 300 K.

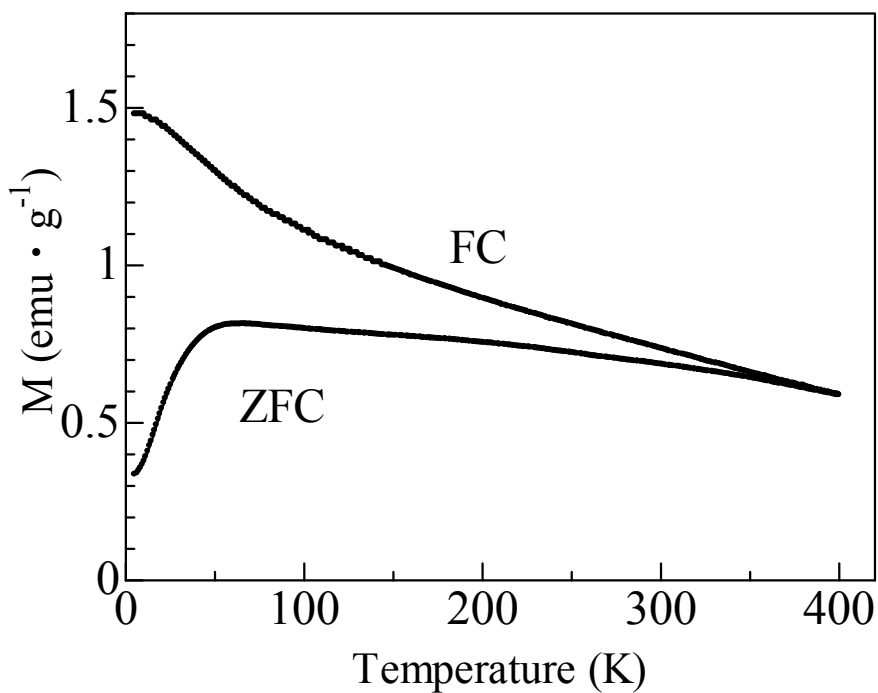

**Fig. S2.** Zero-field-cooled (ZFC) and field-cooled (FC) magnetization curves of SiPc-MNP-SiO<sub>2</sub>. The FC magnetization was measured at 5 mT.

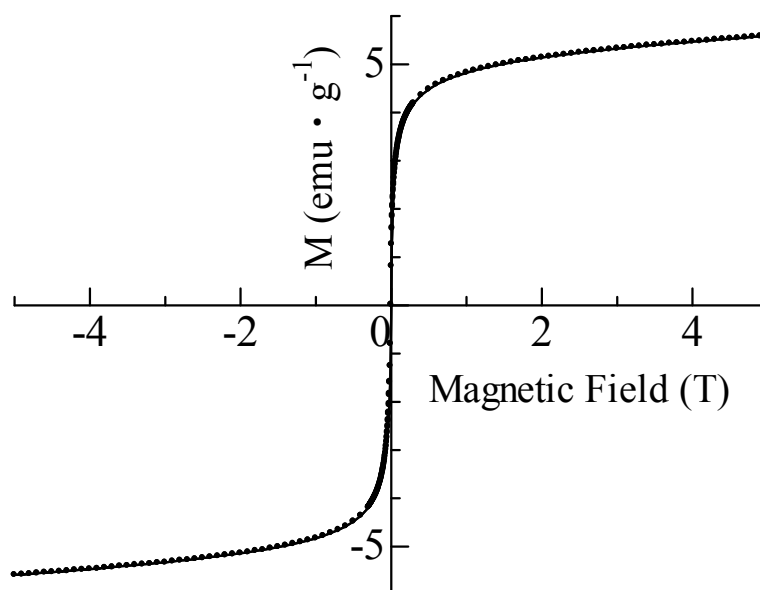

**Fig. S3.** Magnetic hysteresis loop of MNP-SiO<sub>2</sub> at 300K.

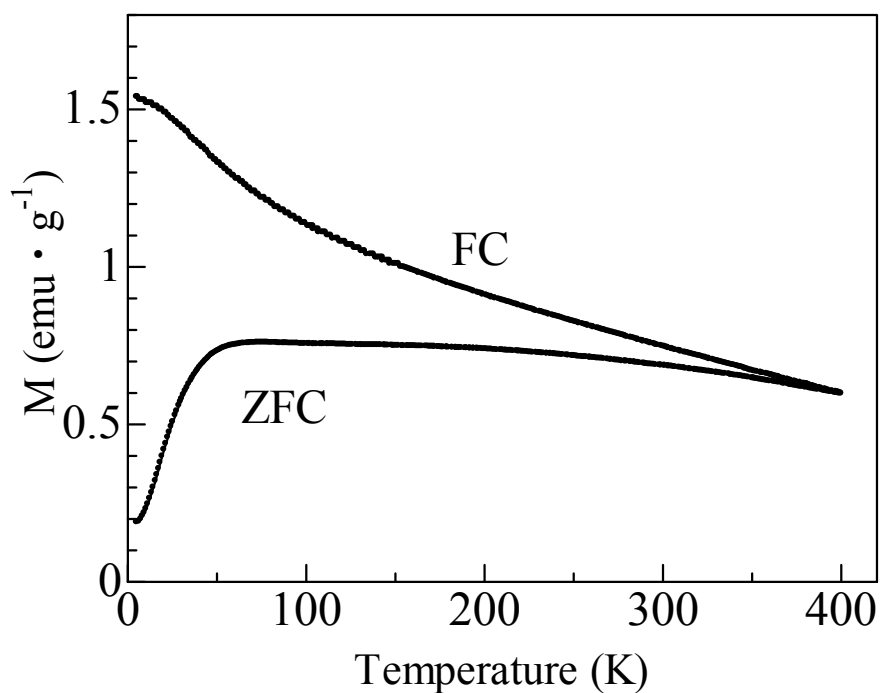

**Fig. S4.** Zero-field-cooled (ZFC) and field-cooled (FC) magnetization curves of MNP-SiO<sub>2</sub>. The FC magnetization was measured at 5 mT.

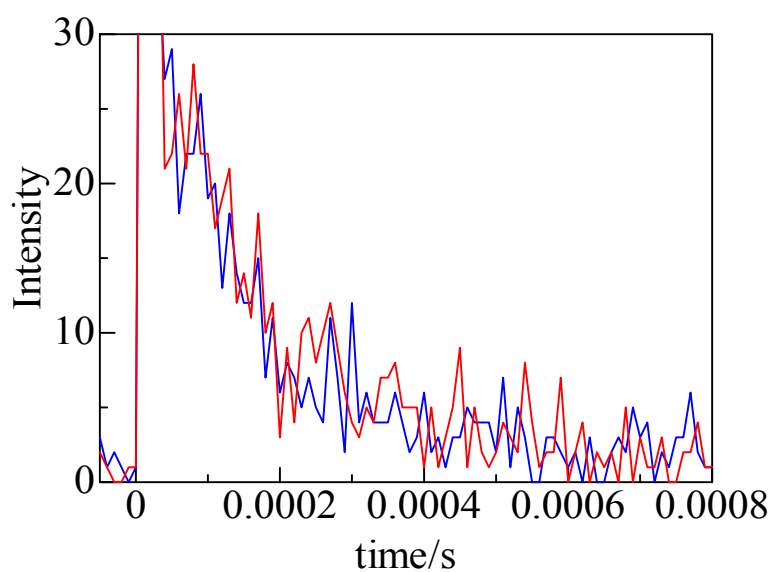

**Fig. S5.** Time-profiles of singlet oxygen luminescence for SiPc-MNP-SiO<sub>2</sub> (red line), and SiPc-SiO<sub>2</sub> (blue line) in CHCl<sub>3</sub> (CHCl<sub>3</sub> contains 0.3-1.0% EtOH as stabilizer). The lifetime is independent of the MNP, which allows us to evaluate the  $\Phi'_{\Delta}/\Phi_{\Delta}$  value.
